# Supplementary material for: Genomic and Transcriptomic Analysis of Bovine Pasteurella multocida Serogroup A Strain Reveals Insights Into Virulence Attenuation
Source: PubMed Central journal article supplement (PMC8631534; doi:10.3389/fvets.2021.765495), 2021-11-10
Supplement: Data_Sheet_1.pdf [file Data_Sheet_1.pdf]

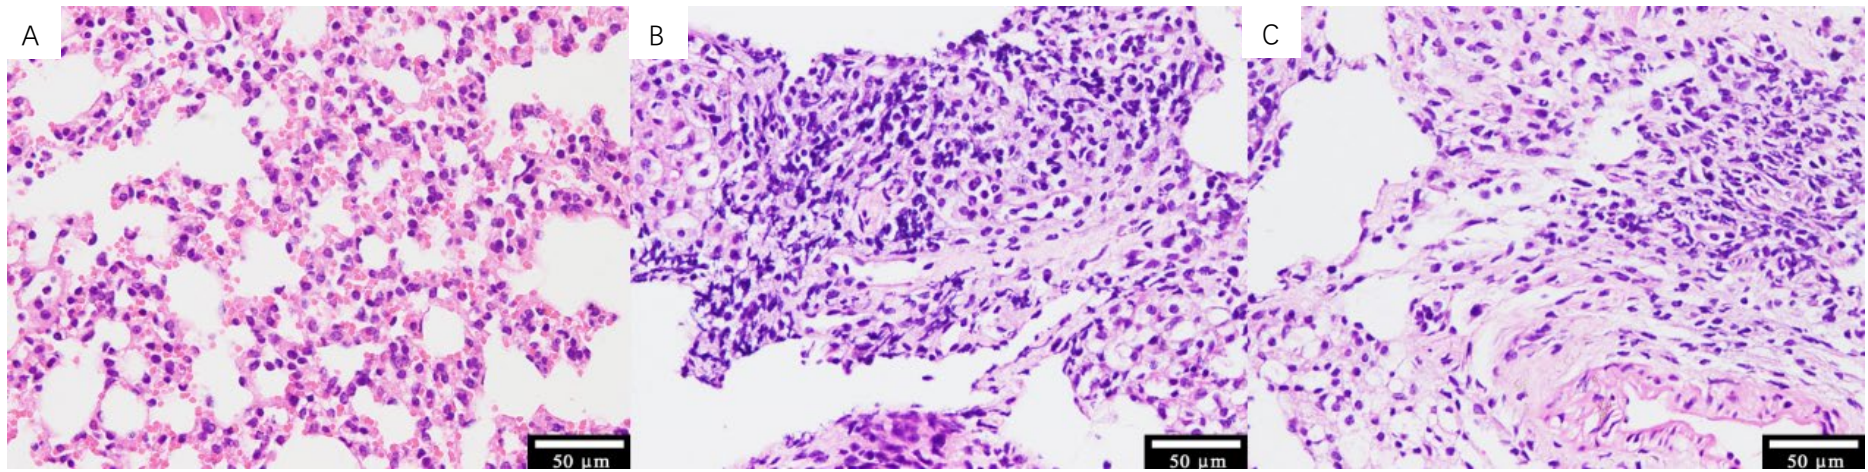

Supplement Figure S1. Observation of Lung Pathological Section. A: PBS control group; B: Pm3 challenge group. All images scale bars are 50  $\mu\text{m}$ .

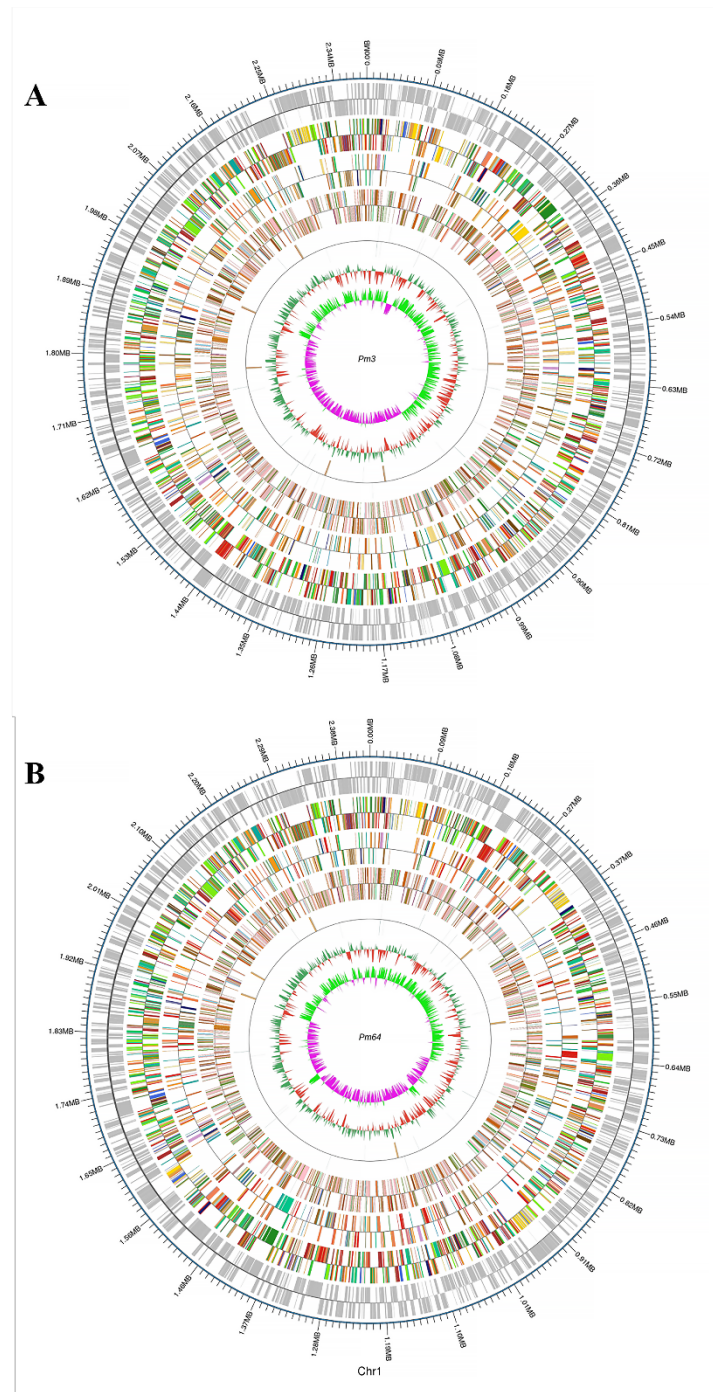

Supplement Figure S2. Relevant genomic features of Pm3 and Pm64 chromosome. (A) Relevant genomic features of Pm3 chromosome. (B) Relevant genomic features of Pm64 chromosome. Moving inward from the outermost circle, each ring of the circle contains information of a genome: coding genes, gene function annotation results (include the annotation results information of COG, KEGG, GO databases), ncRNA, genome GC content and Genomic GC. The inward red part of genome GC content indicated the lower GC content of the whole genome in this region, while the outward green part was contrary. The higher the peak value shows the greater difference between the GC content and the average GC content. The pink part inward of the Genomic GC skew value indicates that the content of G in this region is lower than C, and the light green part outward is contra.

Supplement Table S1. qRT -PCR primers used in this work

| Genes           | Primers                                                           |
|-----------------|-------------------------------------------------------------------|
| <i>ftsH</i>     | F: TGTTCCGTTTCTACCGCACCTTC<br>R: CGTCAACCTGTTACACCGCCATC          |
| <i>dnaK</i>     | F: GCGAAAGGTGAAGATAAAGCGGAAATC<br>R: GCATCCACCACATCATCATTTGACTTAC |
| <i>L31</i>      | F: CCAGAACCACAACGACCATGAAATG<br>R: TAGTACGGGTGTGATGCTGAGGAG       |
| <i>speF</i>     | F: GCTCGGCACTTATGACGGAACC<br>R: ACCTACCCACGCAGAATCAAACAAG         |
| <i>potE</i>     | F: GGGATAACGTTTCGTGACGACGG<br>R: GTAAGCCTCTCCCCTGTTGTGATC         |
| <i>grcA</i>     | F: CGTACAGCGTAACCTGAAACACGG<br>R: CGCGAAACCTTAGAAGATGCGGTC        |
| <i>16S rRNA</i> | F: GCCACGTCTCAAGGACACAG<br>R: TGGGGAGCAAACAGGATTAGA               |

Supplement Table S2. Genomic characteristics of Pm3 and Pm64

| Sample                  | Pm3        | Pm64       |
|-------------------------|------------|------------|
| Type                    | Chromosome | Chromosome |
| GC%                     | 40.28      | 40.3       |
| Genome size(bp)         | 2,386,471  | 2,424,216  |
| Gene number             | 2,265      | 2,328      |
| Gene length/Genome(%)   | 89.01      | 89.07      |
| Gene total length(bp)   | 2,124,156  | 2,159,325  |
| Gene average length(bp) | 938        | 928        |

Supplement Table S3. Specific gene of predicted gene islands in Pm3

| No | Gene annotations | Potential function                                                     |
|----|------------------|------------------------------------------------------------------------|
| 1  | GO:0006352       | DNA-dependent transcription initiation                                 |
| 2  | GO:0016887       | ATPase activity                                                        |
| 3  | <i>RecT</i>      | DNA binding, DNA metabolic process                                     |
| 4  | COG3617          | Prophage anti repressor X Mobilome                                     |
| 5  | <i>MinE</i>      | Septum formation topological specificity factor                        |
| 6  | COG3657          | Putative component of the toxin-antitoxin plasmid stabilization module |
| 7  | COG3636          | DNA-binding prophage protein X Mobilome                                |
| 8  | GO:0043565       | Sequence-specific DNA binding                                          |
| 9  | <i>rpiR</i>      | sequence-specific DNA binding transcription factor                     |
| 10 | <i>YozV</i>      | Uncharacterized membrane protein                                       |
| 11 | GO:0003899       | DNA-directed RNA polymerase activity                                   |
| 12 | COG3617          | Prophage anti repressor X Mobilome                                     |
| 13 | COG4723          | Phage-related protein, tail component X Mobilome                       |
| 14 | <i>treR</i>      | LacI family transcriptional regulator, trehalose operon repressor      |
| 15 | <i>treB</i>      | Phosphotransferase system (PTS), trehalose specific IIB component      |
| 16 | COG2315          | Predicted DNA-binding protein                                          |
| 17 | <i>treC</i>      | Trehalose-6-phosphate hydrolase                                        |
| 18 | <i>YhaK</i>      | Redox-sensitive bicupin                                                |
| 19 | <i>chrR</i>      | NQR chromate reductase, NAD(P)H dehydrogenase (quinone)                |
| 20 | <i>kefB</i>      | Glutathione-regulated potassium-efflux system protein                  |
| 21 | <i>ccmA</i>      | Heme exporter protein A; Membrane transport                            |
| 22 | <i>ccmB</i>      | Heme exporter protein B; Membrane transport                            |
| 23 | <i>ahpC</i>      | Peroxiredoxin (alkyl hydroperoxide reductase subunit C)                |
| 24 | <i>metC</i>      | Cysteine-S-conjugate beta-lyase                                        |

Supplement Table S4. Specific gene of predicted gene islands in Pm64

| No | Gene annotations       | Potential function                                                                                 |
|----|------------------------|----------------------------------------------------------------------------------------------------|
| 1  | <i>KpsS; lipB</i>      | Capsule polysaccharide modification protein                                                        |
| 2  | <i>kpsC, lipA</i>      | Capsule polysaccharide modification protein                                                        |
| 3  | COG1196                | Chromosome segregation ATPase                                                                      |
| 4  | <i>FcbD</i>            | Chondroitin synthase; Glycan biosynthesis and metabolism                                           |
| 5  | GO:0003677             | DNA binding                                                                                        |
| 6  | <i>sfsB</i>            | Ner family transcriptional regulator                                                               |
| 7  | GO:0006313; GO:0015074 | DNA-mediated transposition; Bacteriophage Mu transposase                                           |
| 8  | <i>folD</i>            | methylenetetrahydrofolate dehydrogenase (NADP <sup>+</sup> )/methyltetrahydrofolate cyclohydrolase |

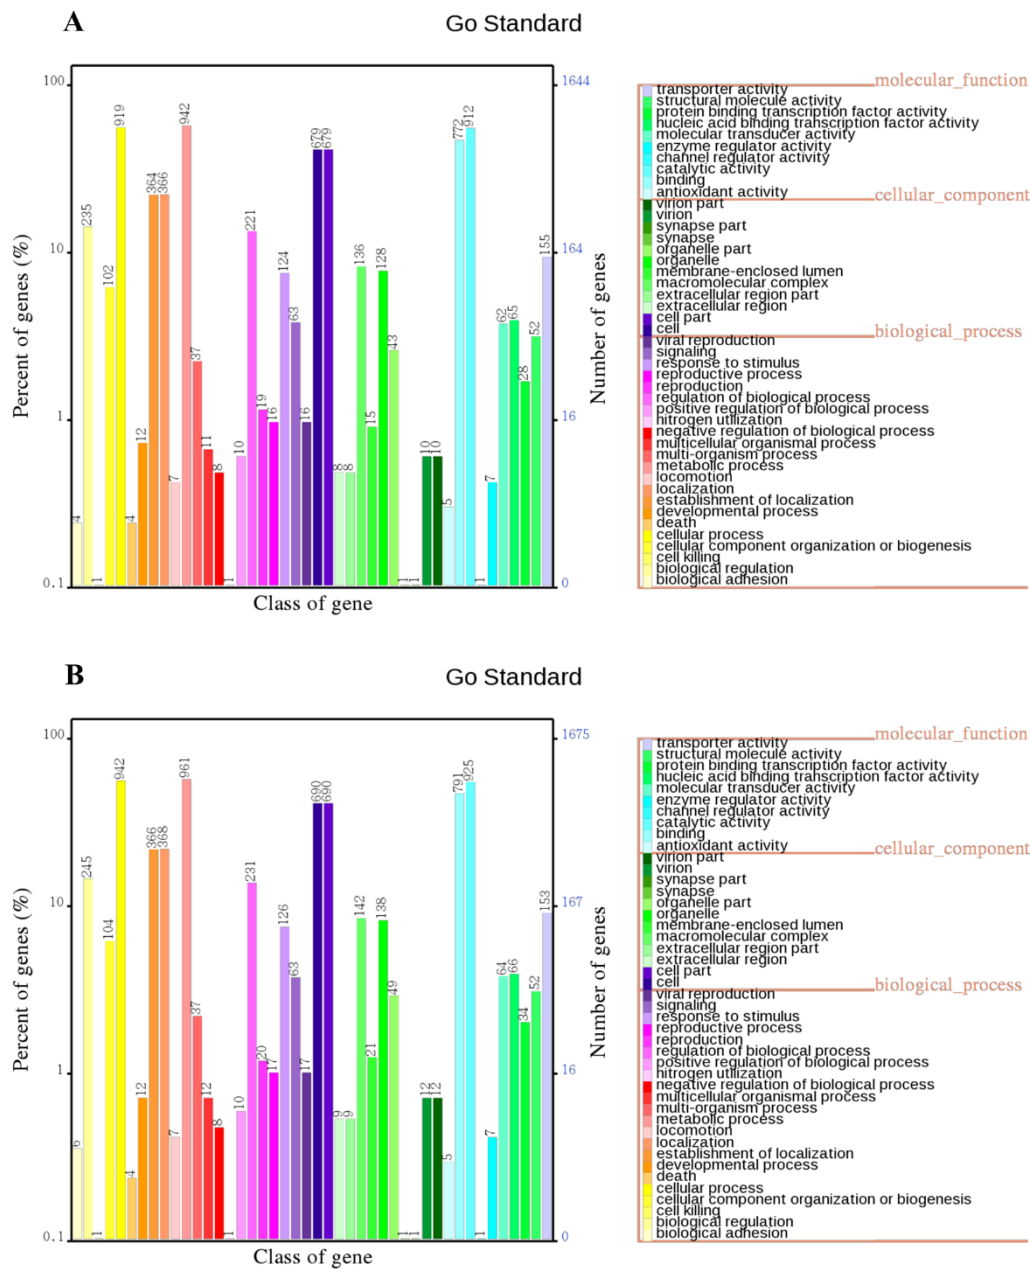

Supplement Figure S3. GO functional classification of Pm3(A) and Pm64(B) genome. The horizontal coordinate represents the GO functional classification on the sample annotation, the vertical coordinate on the right represents the genes number on the annotation, and the vertical coordinate on the left represents the percentage of the number of genes on the annotation in all coding genes.

**A**

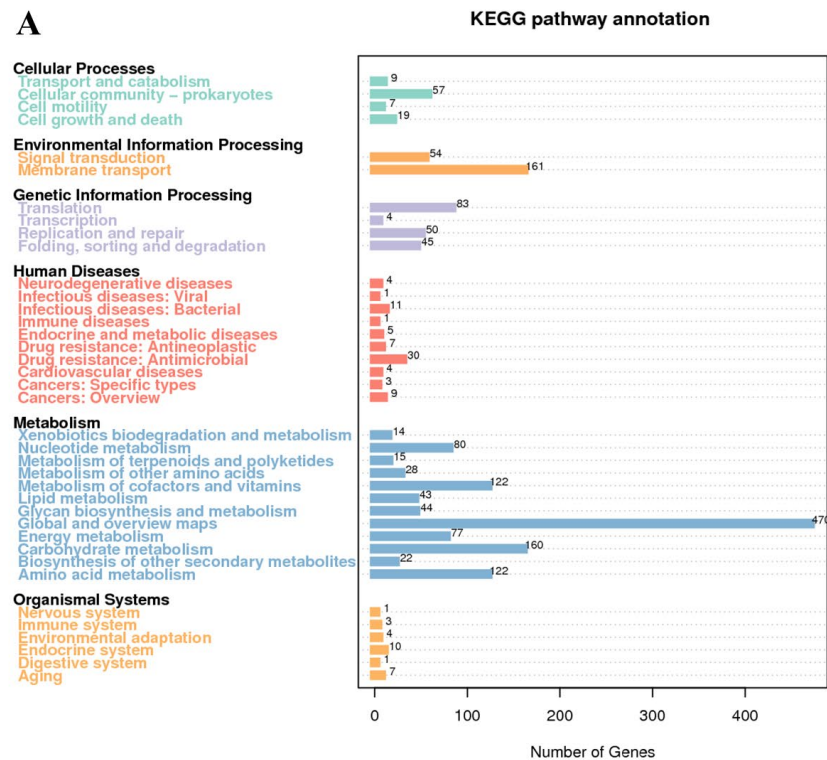

**B**

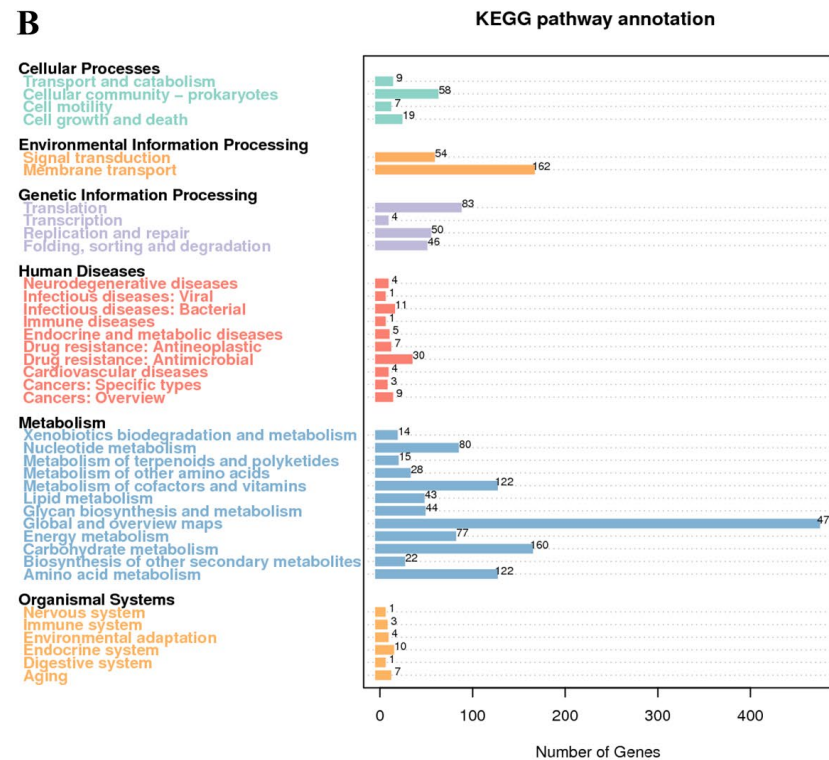

Supplement Figure S4. Classification of KEGG metabolic pathways of Pm3(A) and Pm64(B) genome. The numbers on the bar chart represent the annotated genes number. The remaining axis is the code for each level1 function class in the database.



**A****COG function classification**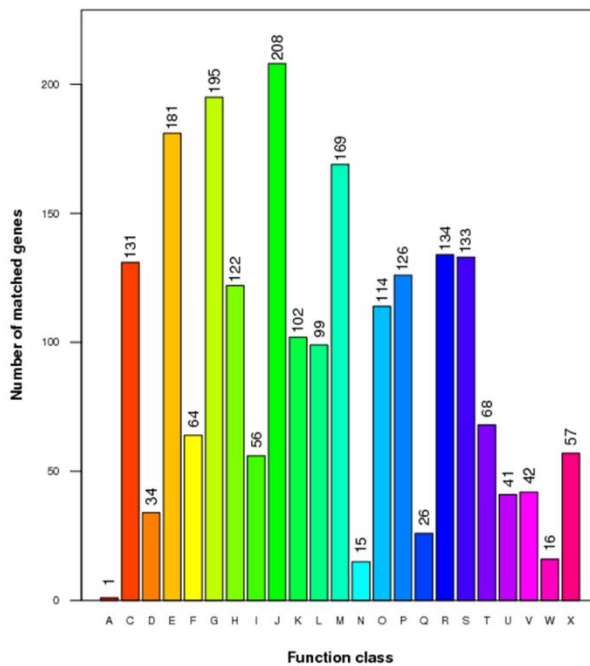

- A: RNA processing and modification (1)
- C: Energy production and conversion (131)
- D: Cell cycle control, cell division, chromosome partitioning (34)
- E: Amino acid transport and metabolism (181)
- F: Nucleotide transport and metabolism (64)
- G: Carbohydrate transport and metabolism (195)
- H: Coenzyme transport and metabolism (122)
- I: Lipid transport and metabolism (56)
- J: Translation, ribosomal structure and biogenesis (208)
- K: Transcription (102)
- L: Replication, recombination and repair (99)
- M: Cell wall/membrane/envelope biogenesis (169)
- N: Cell motility (15)
- O: Posttranslational modification, protein turnover, chaperones (114)
- P: Inorganic ion transport and metabolism (126)
- Q: Secondary metabolites biosynthesis, transport and catabolism (26)
- R: General function prediction only (134)
- S: Function unknown (133)
- T: Signal transduction mechanisms (68)
- U: Intracellular trafficking, secretion, and vesicular transport (41)
- V: Defense mechanisms (42)
- W: Extracellular structures (16)
- X: Mobilome: prophages, transposons (57)

**B****COG function classification**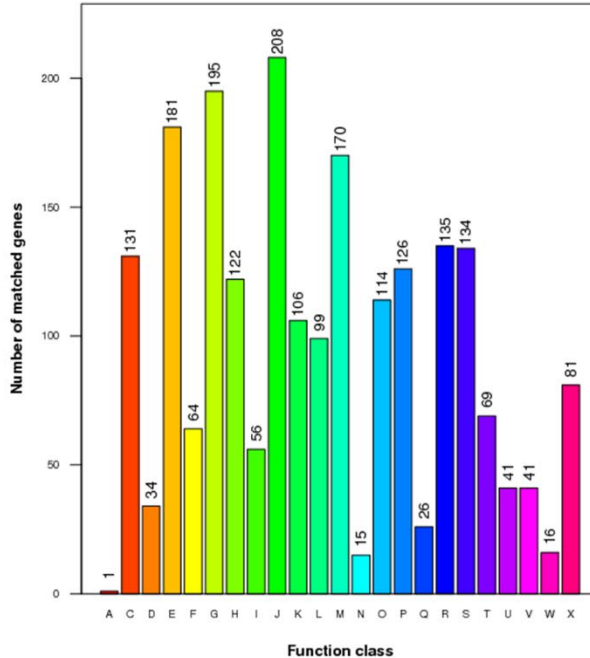

- A: RNA processing and modification (1)
- C: Energy production and conversion (131)
- D: Cell cycle control, cell division, chromosome partitioning (34)
- E: Amino acid transport and metabolism (181)
- F: Nucleotide transport and metabolism (64)
- G: Carbohydrate transport and metabolism (195)
- H: Coenzyme transport and metabolism (122)
- I: Lipid transport and metabolism (56)
- J: Translation, ribosomal structure and biogenesis (208)
- K: Transcription (106)
- L: Replication, recombination and repair (99)
- M: Cell wall/membrane/envelope biogenesis (170)
- N: Cell motility (15)
- O: Posttranslational modification, protein turnover, chaperones (114)
- P: Inorganic ion transport and metabolism (126)
- Q: Secondary metabolites biosynthesis, transport and catabolism (26)
- R: General function prediction only (135)
- S: Function unknown (134)
- T: Signal transduction mechanisms (69)
- U: Intracellular trafficking, secretion, and vesicular transport (41)
- V: Defense mechanisms (41)
- W: Extracellular structures (16)
- X: Mobilome: prophages, transposons (81)

Supplement Figure S5. COG functional classification of Pm3(A) and Pm64(B) genome. The horizontal coordinate represents the functional type of COG, and the vertical coordinate represents the number of genes annotated.

Supplement Table S5. Transcriptome sequencing results statistics and quality assessment.

| Sample                                     | Pm3_1                | Pm3_2                | Pm3_3                | Pm64_1               | Pm64_2               | Pm64_3               |
|--------------------------------------------|----------------------|----------------------|----------------------|----------------------|----------------------|----------------------|
| Total reads                                | 13656988             | 13618462             | 15769964             | 15027712             | 14135486             | 16737618             |
| Total mapped                               | 13502751<br>(98.87%) | 13446591<br>(98.74%) | 15567568<br>(98.72%) | 14782357<br>(98.37%) | 13931429<br>(98.56%) | 16424362<br>(98.13%) |
| Multiple mapped                            | 125013 (0.92%)       | 128446 (0.94%)       | 176262 (1.12%)       | 193184 (1.29%)       | 158587 (1.12%)       | 216796 (1.3%)        |
| Uniquely mapped                            | 13377738<br>(97.96%) | 13318145<br>(97.79%) | 15391306<br>(97.6%)  | 14589173<br>(97.08%) | 13772842<br>(97.43%) | 16207566<br>(96.83%) |
| Positive map                               | 6690632<br>(48.99%)  | 6660320<br>(48.91%)  | 7698061<br>(48.81%)  | 7297225<br>(48.56%)  | 6889401<br>(48.74%)  | 8108472<br>(48.44%)  |
| Negative map                               | 6687106<br>(48.96%)  | 6657825<br>(48.89%)  | 7693245<br>(48.78%)  | 7291948<br>(48.52%)  | 6883441 (48.7%)      | 8099094<br>(48.39%)  |
| Reads mapped in proper pairs               | 13281818<br>(97.25%) | 13220458<br>(97.08%) | 15281178<br>(96.9%)  | 14494914<br>(96.45%) | 13699712<br>(96.92%) | 16115110<br>(96.28%) |
| Proper-paired reads map to different chrom | 0 (0%)               | 0 (0%)               | 0 (0%)               | 0 (0%)               | 0 (0%)               | 0 (0%)               |

Total reads: clean data of sequencing filtered by sequencing data; Total Mapped: sequences could be mapped to the genome; Multiple Mapped: sequences with multiple alignments on the reference sequence; Redundant mapped: sequences with a unique alignment position on the reference sequence; Positive map, negative map: number of positive and negative sequences that have been aligned to the genome; Reads mapped in proper pairs, proper-paired reads map to different chrom: Paired sequence mapped to the reference genome and different chromosomes.

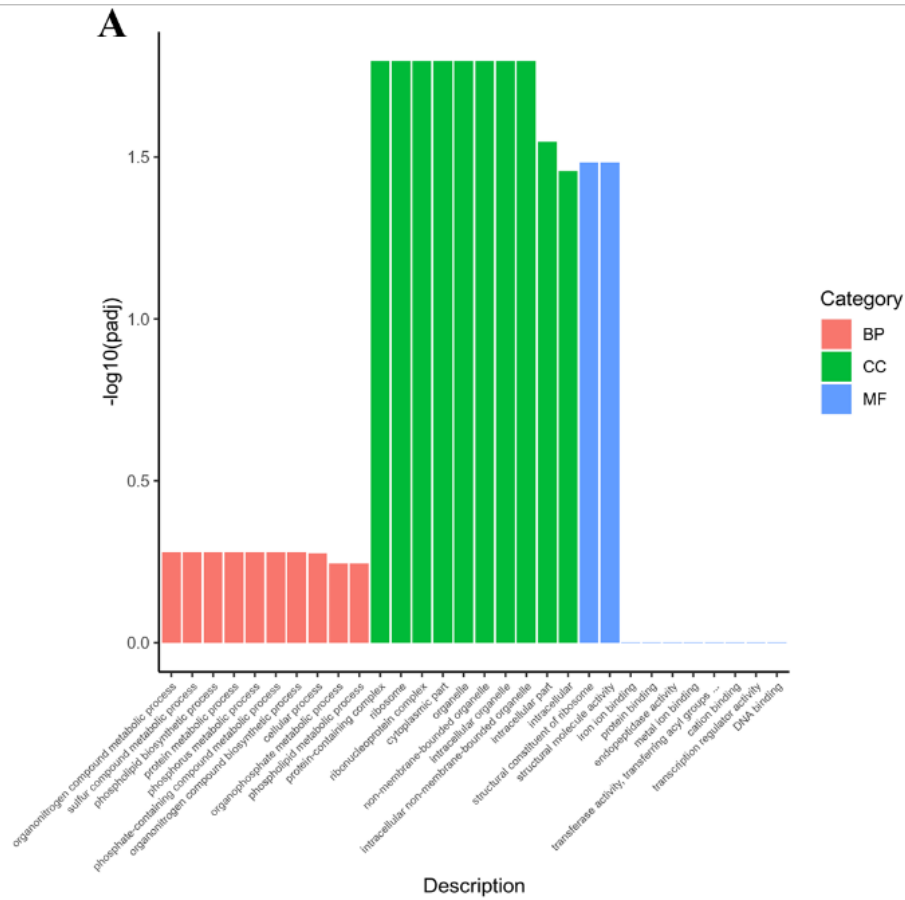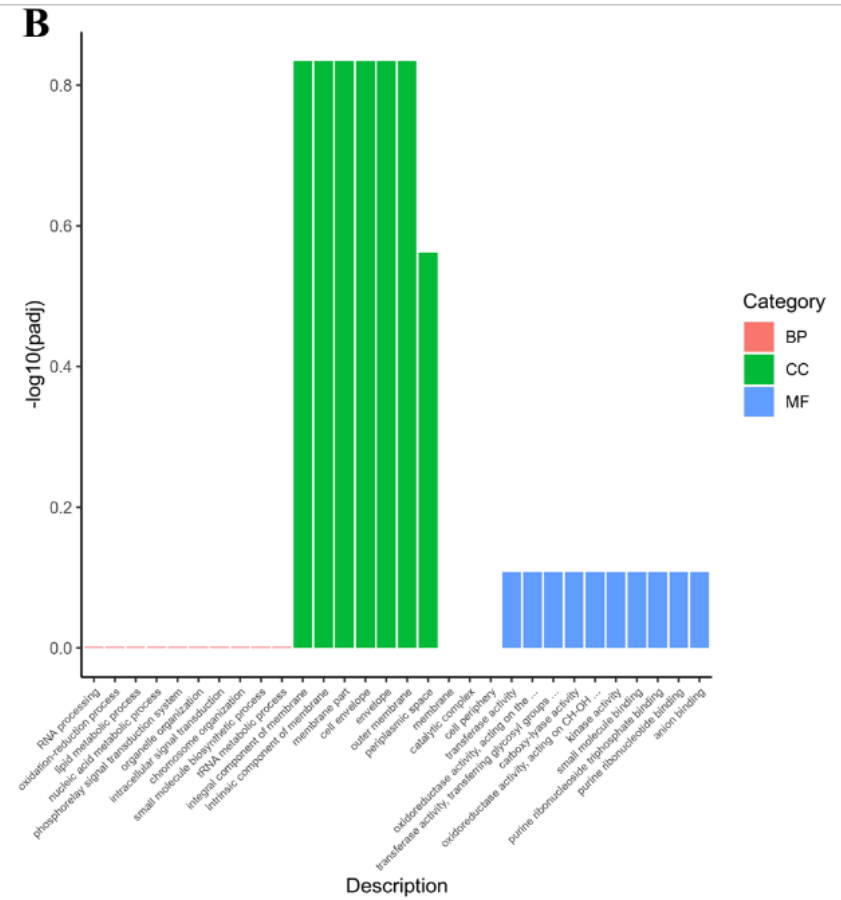

Supplement Figure S6. GO enrichment analysis of DEGs (Pm3 vs Pm64). (A). Functional enrichment of up-regulated genes. (B). Functional enrichment of down-regulated genes.

Supplement Table S6. Virulence factor related DEGs annotated in VFDB from Pm3/Pm64

| No                    | VF_id  | VF_name                                          | Related_genes | Log2FoldChange |
|-----------------------|--------|--------------------------------------------------|---------------|----------------|
| <b>up-regulated</b>   |        |                                                  |               |                |
| 1                     | AI392  | MOMP                                             | <i>dnaK</i>   | 5.00           |
| 2                     | AI104  | fimbrial low-molecular-weight protein (Flp) pili | <i>tadD</i>   | 3.20           |
| 3                     | AI104  | fimbrial low-molecular-weight protein (Flp) pili | <i>tadF</i>   | 3.14           |
| 4                     | VF0260 | RelA                                             | <i>relA</i>   | 2.27           |
| 5                     | CVF358 | Cytochrome c muturation (ccm) locus              | <i>ccmB</i>   | 1.86           |
| 6                     | CVF494 | LPS                                              | <i>lpxC</i>   | 1.69           |
| 7                     | CVF486 | Type IV pili                                     | <i>comE</i>   | 1.64           |
| 8                     | CVF358 | Cytochrome c muturation (ccm) locus              | <i>ccmE</i>   | 1.40           |
| 9                     | CVF494 | LPS                                              | <i>lpxB</i>   | 1.29           |
| 10                    | AI104  | Flp Type IV pili                                 | <i>flpI</i>   | 1.25           |
| 11                    | CVF309 | Leucine synthesis                                | <i>leuD</i>   | 1.00           |
| <b>down-regulated</b> |        |                                                  |               |                |
| 12                    | CVF494 | LOS                                              | <i>galE</i>   | -2.96          |
| 13                    | CVF494 | LPS                                              | <i>rfaC</i>   | -2.83          |
| 14                    | CVF845 | Pyrimidine biosynthesis                          | <i>carA</i>   | -2.19          |
| 15                    | CVF506 | Heme biosynthesis                                | <i>hemH</i>   | -2.17          |
| 16                    | CVF494 | LOS                                              | <i>msbA</i>   | -1.44          |
| 17                    | CVF491 | OapA                                             | <i>oapA</i>   | -1.13          |
| 18                    | CVF506 | Heme biosynthesis                                | <i>hemE</i>   | -1.07          |
| 19                    | CVF506 | Heme biosynthesis                                | <i>hemG</i>   | -1.01          |
| 20                    | CVF308 | Tryptophan synthesis                             | <i>trpD</i>   | -1.00          |
